# Supplementary figures and images for: Massive gene decay in the leprosy bacillus
Source: Springer Nature journal article supplement (doi:10.1038/35059006), 2001-02-01

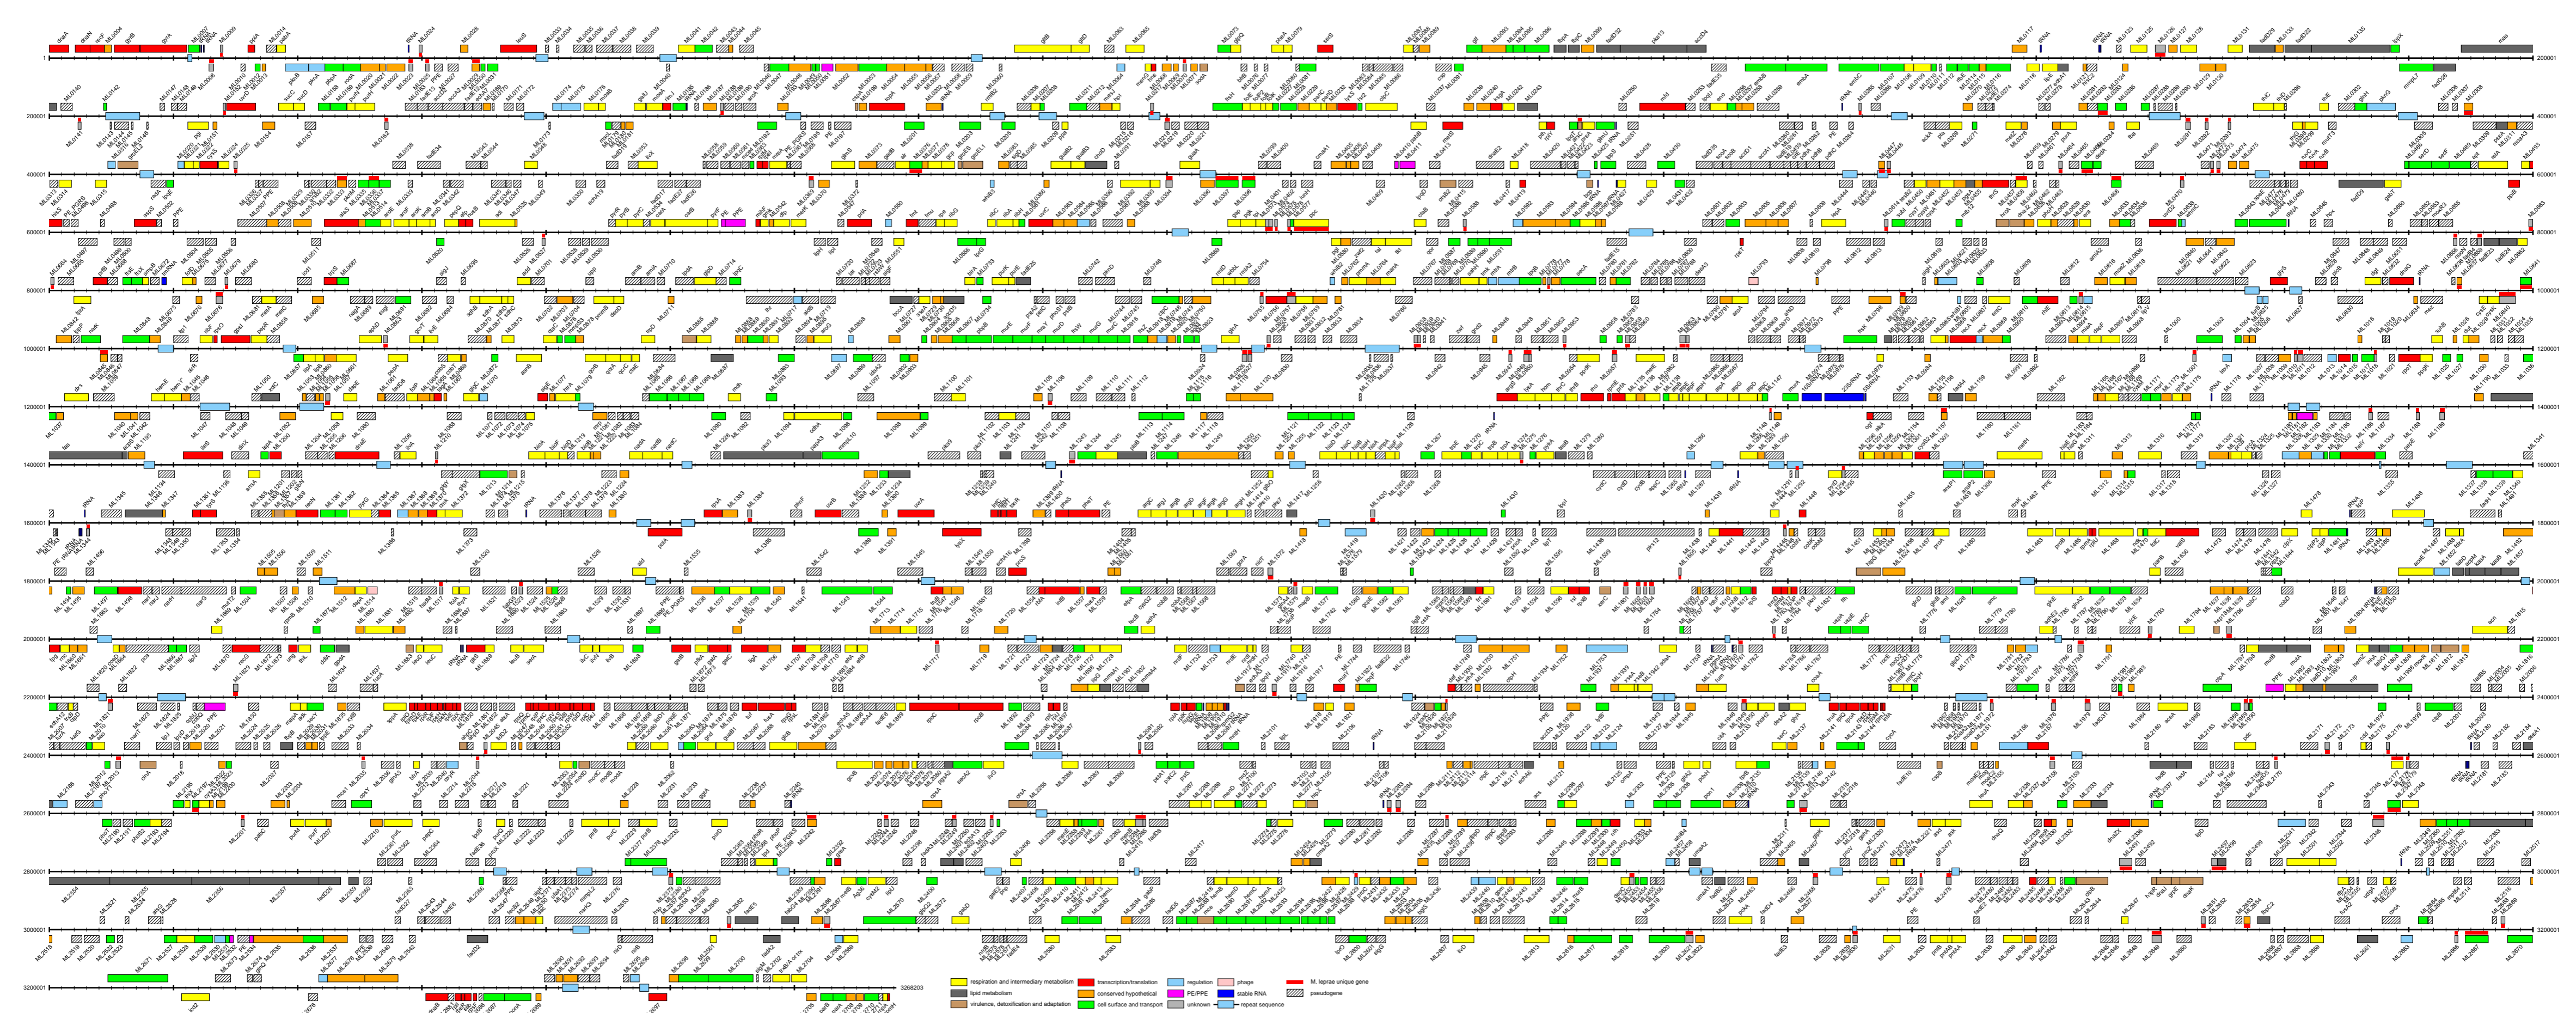

3288203

Supplement: 41586_2001_BF35059006_MOESM2_ESM.pdf [file 41586_2001_BF35059006_MOESM2_ESM.pdf]
